# Supplementary material
Source: publisher site journal article supplement (https://www.degruyterbrill.com/publication/isbn/9783110713664/downloadAsset/9783110713664_Tables%20and%20Figures.xlsx)
Supplement: Supplementary file 1 [file 9783110713664_Tables%20and%20Figures.xlsx]

## Sheet: Table 2.1
	Table 2.1: Capital Structure Determinants - Prediction on Leverage
	Determinants	Description	Trade-Off Theory	Pecking Order Theory
	Firm-Specific		Prediction on Leverage
	Profitability	Return on Assets (ROA)	positive/negative*	negative
	Growth	Growth Opportunities (MTB)	negative	positive
	Size (Sales)	Firm Size	positive	negative
	Tangibility	Fixed Assets (Collateral)	positive	negative
	Business Risk	Earnings Volatility	negative	positive
	R&D Expenses	Research and Development Expenses	negative	positive
	Tax Rate	Effective Tax Rates	positive	-
	NDTS	Non-Debt Tax Shield	negative	-
	Bankruptcy	Financial Distress (Altman Z-Score)	negative	-
	Macroeconomic
	GDP	GDP growth (annual %)	positive	negative
	Inflation	Inflation, Consumer Prices (annual %)	positive	-
	Interest Rate	Lending Interest Rate (%)	negative	-
	Stock Market Dev.	Stock Market Development	negative	-
	Debt Market Dev.	Debt/Bond Market Development	positive	-
	Country Governance	Governance Indicator (WorldBank)	positive	-
	Industry Leverage	Median Industry Leverage	positive	-
			* Dynamic Trade-Off Theory

## Sheet: Table 3.1
	Table 3.1: Dow Jones Islamic Index - Shari’ah Compliance Criteria
	Screening		Definition			Threshold
	i	Qualitative Aspect	Alcohol, tobacco, pork-related products, weapons and defense, conventional financial servicesa (banking, insurance, etc.), entertainment (hotels, casinos/gambling, cinema, pornography, music, etc.)
	ii	Quantitative Aspect	• Impermissible Revenue	/	Total Revenue	≤ 5%b
			• Interest-Bearing Debt	/	Market Capitalization (trailing 24-month average)c	< 33%
			• Cash and Interest-Bearing Securities
			• Accounts Receivables
	a Islamic Banking and Takaful Insurance Companies are excluded.
	b Maximum tolerable impermissible (Shari'ah non-compliant) income is subject to purification (e.g., donation).
	c Trailing period was 12-month in 2003 and increased to 24-month in 2011.

## Sheet: Table 3.2
	Table 3.2: Overview of financial items frequently used on leverage ratios
	Part A: Financial items applied*		Part B: Financial items classified		Part C: Dow Jones Islamic Index
	Numerator	Denominator	Endogenous	Exogenous	Leverage Ratio
	Short-Term Debt	Total Assets	Short-Term Debt	Market Capitalization	Total Debt/Market Capitalization
	Long-Term Debt	Total Capital	Long-Term Debt
	Total Debt	Total Equity	Total Debt
	Total Liabilities	Market Capitalization	Total Liabilities
			Total Assets
			Total Capital
			Total Equity
	* not limited to

## Sheet: Table 3.3
	Table 3.3: Simplified Balance Sheet
	Balance Sheet
		non-interest-bearing
		interest-bearing
		Total Liabilities
		Total Equity
	Total Assets	Total Liability and Equity

## Sheet: Table 3.4
	Table 3.4: Leverage criteria applied in Shari’ah screening methodologies
	Islamic Index Provider	Numerator	Denominator	Threshold
	FTSE	Total Debt	Total Assets	< 33.33%
	KSE Meezan	Total Debt	Total Assets	< 37%
	Malaysia SC	Total Debt	Total Assets	< 33%
	MSCI	Total Debt	Total Assets	< 30%
	AAOIFI	Total Debt	Market Capitalization	< 30%
	Al-Rajhi	Total Debt	Market Capitalization	< 30%
	Borsa Istanbul	Total Debt	Market Capitalization	< 30%
	Dow Jones	Total Debt	24–month trailing Market Capitalization	< 33%
	S&P	Total Debt	36–month trailing Market Capitalization	< 33%
	STOXX*	Total Debt	Market Capitalization/Total Assets	< 33%
	* STOXX denominator considers both, Total Assets or Market Capitalization (whichever is greater).
	Islamic index providers are listed alphabetically within Total Assets/Market Capitalization classes.
	Source: Own compilation from the documentation available on the websites of each index provider.

## Sheet: Table 3.5
	Table 3.5: Proposed Index Screening Methodologies (one-criterion approach)
	Screening Type	Equation	Ratio	Threshold
	Strict	SC(3’’)	Total Equity / Total Assets	≥ 75%
	Lenient	SC(4)	Total Equity / Total Assets	≥ 66.67%

## Sheet: Table 3.6
	Table 3.6: Proposed Index Screening Methodologies (two-criterion approach)
	Screening Type	Equation	Ratio		Threshold
	Moderate	SC(4)	I	Total Equity / Total Assets	≥ 66.67%
		SC(2‘)	II	Total Debt / Total Equity	≤ 33.33%

## Sheet: Table 3.7
	Table 3.7: Descriptive Statistics for Non-Interest-Bearing Debt of SC companies
	Non-Interest-Bearing Debt*	Mean	Std.Dev	Min	Max	Obs
	Overall	0.295794	0.123077	0.0776	0.6866	6618
	United States	0.300123	0.122649	0.0776	0.6866	3518
	United Kingdom	0.351865	0.123875	0.0776	0.6866	606
	Canada	0.251486	0.103011	0.0776	0.6797	441
	Japan	0.267246	0.0928348	0.0776	0.594	931
	South Korea	0.258551	0.0950752	0.0776	0.548	217
	Taiwan	0.228869	0.13187	0.0776	0.6866	263
	India	0.330979	0.142319	0.0776	0.6866	642
	Oil and Gas	0.283011	0.106549	0.0776	0.669	556
	Basic Materials	0.248238	0.104034	0.0776	0.5884	527
	Industrials	0.331555	0.135655	0.0776	0.6866	1668
	Consumer Goods	0.314898	0.1092	0.0776	0.6866	1150
	Technology	0.272847	0.129916	0.0776	0.6866	1089
	Health Care	0.244163	0.1003	0.0776	0.664	867
	Consumer Services	0.322471	0.111951	0.0776	0.6866	761
	* whereby, Non-Interest-Bearing Debt = (Total Liabilities - Total Debt**) / Total Assets ** whereby, Total Debt = Short-Term Debt + Long-Term Debt (all interest-bearing debt)

## Sheet: Table 3.8
	Table ‎3.8: Proposed RIEM (Ramy Islamic Equity Market) Methodologies
	Islamic Stock Indices		RIEM 75 Index●(*)		RIEM 66-33 Index●(**)		RIEM 66 Index●(*)
	Index Classes		Class A		Class B		Class C
	Screening Type		strict		moderate		lenient
	i	Qualitative Aspect	Alcohol, tobacco, pork-related products, weapons and defense, conventional financial servicesa (banking, insurance, etc.), entertainment (hotels, casinos/gambling, cinema, pornography, music, etc.)b
	ii	Quantitative Aspect		Impermissible Revenue/Total Revenue ≤ 5%
			I	TE/TA ≥ 75%	I	TE/TA ≥ 66.67%	I	TE/TA ≥ 66.67%
					II	TD/TE ≤ 33.33%
	● (proposed name) (*) one-criterion approach (**) two-criterion approach

## Sheet: Table 3.9
	Table 3.9: Projections/Classifications of the Islamic Stock Market Indices
	Index Classes	Islamic Index (Provider)		Numerator	Denominator	Threshold
	Class A	RIEM 75		Total Equity	Total Assets	≥ 75%
	Class B	RIEM 66-33 (*)	I	Total Equity	Total Assets	≥ 66.67%
			II	Total Debt	Total Equity	≤ 33.33%
	Class C	RIEM 66		Total Equity	Total Assets	≥ 66.67%
	Class D	FTSE		Total Debt	Total Assets	< 33.33%
		KSE Meezan		Total Debt	Total Assets	< 37%
		Malaysia SC		Total Debt	Total Assets	< 33%
		MSCI		Total Debt	Total Assets	< 30%
	Class E	AAOIFI		Total Debt	Market Capitalization	< 30%
		Al-Rajhi		Total Debt	Market Capitalization	< 30%
		Borsa Istanbul		Total Debt	Market Capitalization	< 30%
		Dow Jones		Total Debt	24–month trailing Market Capitalization	< 33%
		S&P		Total Debt	36–month trailing Market Capitalization	< 33%
		STOXX(**)		Total Debt	Market Capitalization or Total Assets	< 33%
	Source: Own compilation from the documentation available on the websites of each index provider.
	(*) two-criterion approach
	(**) STOXX denominator considers both, Total Assets or Market Capitalization (whichever is greater).

[truncated: 90 more sheets: Table 4.1, Table 4.2, Table 4.3, Table 4.4, Table 4.5, Table 4.6, Table 4.7, Table 4.8, Table 4.9, Table 4.10, Table 4.11, Figures 5.1 and 5.2, Table 5.1, Table 5.2, Figures 5.3 and 5.4, Figure 5.5, Table 5.3, Table 5.4, Table 5.5, Table 5.6 …]
